# Supplementary material
Source: PubMed Central journal article supplement (PMC6005452)
Supplement: supp_RA118.001825_135111_2_supp_124953_p7nd2v.pdf [file supp_RA118.001825_135111_2_supp_124953_p7nd2v.pdf]

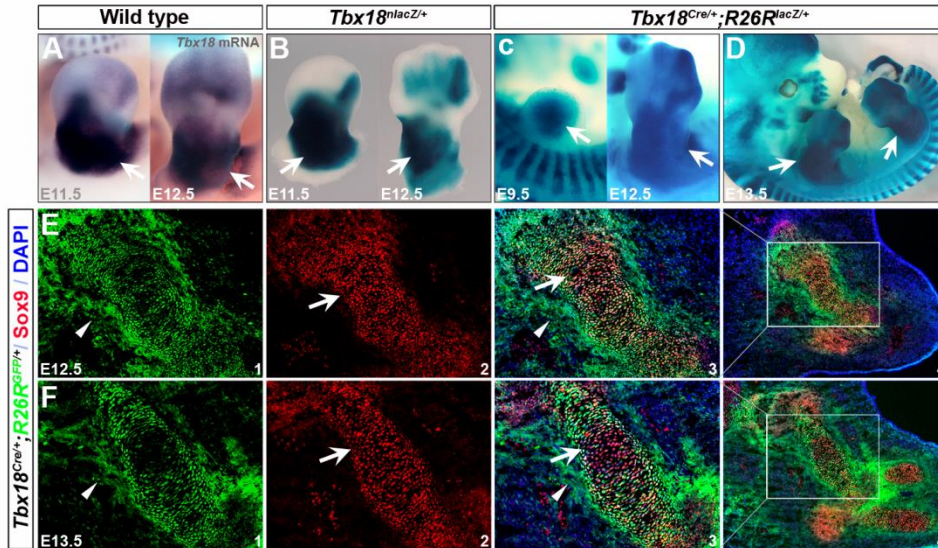

**Figure S1 Expression and lineage of *Tbx18* in the developing limb.** (A-B) RNA *in situ* hybridization and X-gal staining show *Tbx18* expression in the forelimbs at E11.5 and E12.5. (C) X-gal staining shows *Tbx18* lineage (*Tbx18*<sup>Cre/+</sup>;*Rosa26*<sup>lacZ/+</sup>) on the forelimb at E9.5 and E12.5. (D) Whole-mount view of *Tbx18* lineage with forelimb and hindlimb at E13.5. Arrows in A-D indicate positive *Tbx18* RNA or X-gal staining. (E-F) Immunofluorescence analysis of *Tbx18* lineage (*Tbx18*<sup>Cre/+</sup>;*Rosa26*<sup>GFP/+</sup>) with Sox9 staining on the forelimb at E12.5 and E13.5. Arrows in E,F indicate Sox9-positive chondrocytes and arrowheads indicate *Tbx18* lineage adjacent to chondrocytes. E3/F3 are high magnification images for E4/F4 in the square areas (humerus), and they are merged images of E1/2 and F1/2 with DAPI, respectively.

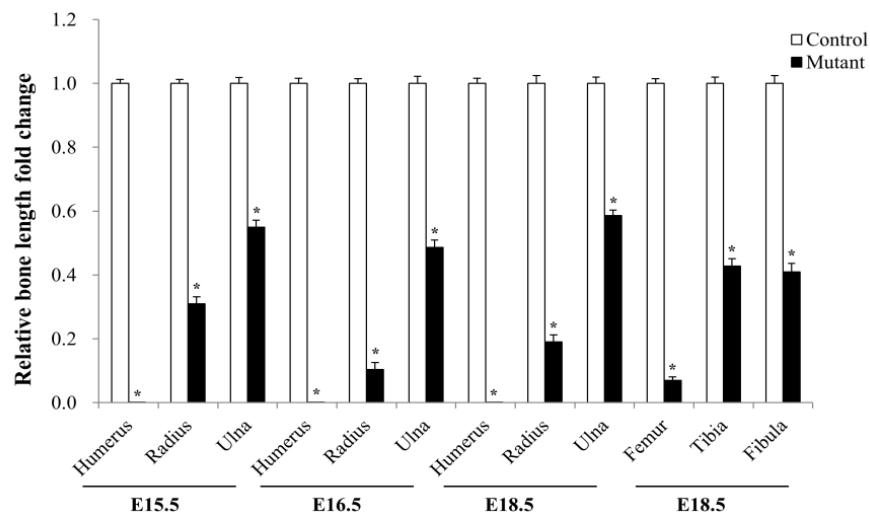

**Figure S2 Reduced skeletal development in *Smad4* mutant mice.** Skeletons of E15.5-E18.5 embryos were stained with Alizarin red (calcified tissue) and Alcian blue (cartilage). Quantification of bone length was analyzed by Image J (n=3). \*P < 0.05 vs. control.
